# Supplementary material
Source: publisher site journal article supplement (https://www.spandidos-publications.com/3193/downloadSupplementary)
Supplement: Supplementary file 1 [file downloadSupplementary]

## Sheet: miRNA expression-count
Table SI. Count of reads in miRNAs.
miRNA_name	Locus	0A	0B	0C	12A	12B	12C	24A	24B	24C
rno-let-7a-1-3p	chr17:16417916-16417937+	221	137	189	63	85	116	88	133	76
rno-let-7a-2-3p	chr8:45753325-45753346+	35	28	33	0	6	6	10	8	9
rno-let-7a-5p	chr17:16417865-16417886+	42595	37564	50223	31985	21936	43301	33405	35148	28456
rno-let-7b-3p	chr7:126590687-126590708+	180	138	167	32	28	42	23	62	32
rno-let-7b-5p	chr7:126590633-126590654+	16767	15920	20881	12564	9404	16667	14673	13056	10934
rno-let-7c-1-3p	chr11:16052933-16052954+	142	117	129	12	16	26	24	19	13
rno-let-7c-2-3p	chr7:126590273-126590294+	201	150	192	81	81	115	90	106	72
rno-let-7c-5p	chr11:16052888-16052909+	70790	71162	86227	71144	52378	97744	79302	67588	60260
rno-let-7d-3p	chr17:16420047-16420068+	3359	3319	3564	2700	2526	4487	3598	3736	2863
rno-let-7d-5p	chr17:16419993-16420014+	11317	10057	13441	12378	8138	16650	13589	13063	12495
rno-let-7e-3p	chr1:59704440-59704461+	157	118	132	9	26	16	37	41	47
rno-let-7e-5p	chr1:59704395-59704416+	9476	9875	11243	9348	6695	12585	9504	9466	8835
rno-let-7f-1-3p	chr17:16418284-16418304+	23	12	19	8	5	2	4	1	2
rno-let-7f-5p	chr17:16418228-16418249+	55271	59132	63618	59514	36398	74487	60167	55524	55562
rno-let-7g-3p	chr8:114874520-114874540+	18	19	23	5	5	11	12	10	12
rno-let-7g-5p	chr8:114874463-114874484+	14677	12588	16048	11283	7455	15061	10417	11922	10968
rno-let-7i-3p	chr7:66802792-66802813+	139	146	142	92	86	192	108	153	123
rno-let-7i-5p	chr7:66802736-66802757+	91269	109095	105406	84902	57483	110370	99616	93550	84364
rno-miR-100-3p	chr8:45746995-45747013+	141	136	139	50	42	65	64	67	53
rno-miR-100-5p	chr8:45746960-45746981+	19429	2119	19779	12118	4361	6577	11443	16423	9775
rno-miR-101a-3p	chr5:120168445-120168465-	9203	9935	10400	5953	5315	9161	6644	7847	6441
rno-miR-101a-5p	chr5:120168481-120168502-	10	16	19	4	8	11	8	10	8
rno-miR-101b-3p	chr1:247263783-247263803+	6171	7203	7159	5012	3982	7682	7308	7643	6131
rno-miR-103-2-5p	chr3:123833685-123833701+	6	5	3	5	6	14	6	9	8
rno-miR-103-3p	chr10:20606766-20606788+	20698	21785	23894	18365	13971	24543	22819	20844	20068
rno-miR-106b-3p	chr12:19307761-19307782-	1398	1491	1603	1283	1009	1676	1688	1614	2096
rno-miR-106b-5p	chr12:19307802-19307822-	2472	2125	787	2042	1886	974	2473	3108	505
rno-miR-107-3p	chr1:253128263-253128285-	884	666	909	204	651	6683	5247	828	5146
rno-miR-107-5p	chr1:253128299-253128322-	3	2	3	1	0	15	4	3	0
rno-miR-10a-3p	chr10:84166012-84166033+	234	149	205	149	123	217	162	171	223
rno-miR-10a-5p	chr10:84165971-84165993+	235640	128480	231891	173580	191421	249534	230827	328035	242233
rno-miR-10b-3p	chr3:61648042-61648062+	214	110	205	58	98	157	123	46	71
rno-miR-10b-5p	chr3:61648005-61648026+	1000805	607958	981282	778672	938415	1233517	1093685	1528440	1011381
rno-miR-1224	chr11:83992692-83992712-	30	33	22	34	15	23	24	24	9
rno-miR-1249	chr7:125861222-125861243-	118	101	138	58	60	80	95	92	53
rno-miR-125a-3p	chr1:59704879-59704900+	267	199	269	77	88	121	104	109	108
rno-miR-125a-5p	chr1:59704841-59704864+	29832	19793	33175	22719	19306	31167	24349	26006	22857
rno-miR-125b-1-3p	chr8:45798314-45798335+	6843	3894	5428	738	497	1051	973	1191	966
rno-miR-125b-2-3p	chr11:16097401-16097422+	7718	6187	7586	3190	2330	4580	3695	4427	4196
rno-miR-125b-5p	chr11:16097362-16097383+	24505	13029	23784	19522	15318	29750	24645	32897	24033
rno-miR-126a-3p	chr3:4042533-4042554+	357	378	447	412	277	495	369	402	395
rno-miR-126a-5p	chr3:4042496-4042516+	7891	4961	6547	52	4842	10684	7452	10668	8305
rno-miR-126b	chr3:4042491-4042512-	2	1	0	3	1	3	0	3	1
rno-miR-128-1-5p	chr13:44916548-44916568+	443	303	455	38	30	53	30	62	42
rno-miR-128-3p	chr13:44916583-44916603+	3162	2601	1510	3664	2913	2302	2159	4727	4499
rno-miR-129-2-3p	chr3:83137312-83137333-	19	19	25	25	26	31	47	42	37
rno-miR-129-5p	chr3:83137355-83137375-	53	51	53	58	42	60	65	78	73
rno-miR-1306-3p	chr11:86857680-86857701+	3	8	3	5	6	5	6	2	6
rno-miR-1306-5p	chr11:86857641-86857662+	167	147	156	165	146	206	189	223	158
rno-miR-130a-3p	chr3:72141049-72141070-	12986	12217	13606	12096	11937	20958	15627	18226	23696
rno-miR-130a-5p	chr3:72141089-72141110-	85	122	144	56	38	82	76	57	43
rno-miR-130b-3p	chr11:88129823-88129844+	15	14	17	14	11	38	19	9	19
rno-miR-130b-5p	chr11:88129785-88129806+	3	4	0	0	1	5	4	2	5
rno-miR-132-3p	chr10:62015053-62015074+	308	395	40	331	241	414	421	41	356
rno-miR-132-5p	chr10:62015017-62015038+	18	22	2	2	2	14	14	6	2
rno-miR-133a-3p	chr18:2052492-2052513-	75	56	73	82	54	99	80	85	103
rno-miR-133b-3p	chr9:26795696-26795717+	626	418	599	283	303	469	295	346	256
rno-miR-133b-5p	chr9:26795659-26795679+	127	144	130	1	0	0	0	1	1
rno-miR-138-2-3p	chr19:11149754-11149774-	4	7	9	5	3	6	3	2	0
rno-miR-138-5p	chr19:11149799-11149821-	918	585	498	381	627	546	1000	637	412
rno-miR-139-5p	chr1:166589551-166589572+	176	116	173	169	45	53	88	75	128
rno-miR-1-3p	chr18:2054945-2054966-	7	7	9	3	2	6	1	1	4
rno-miR-140-3p	chr19:39609011-39609031+	11225	10979	12081	9140	7388	13139	12585	12427	10894
rno-miR-140-5p	chr19:39608972-39608993+	281	213	240	204	195	318	230	304	270
rno-miR-143-3p	chr18:56971297-56971318-	78071	81283	85326	65569	50436	91363	81244	87280	81066
rno-miR-143-5p	chr18:56971332-56971352-	505	308	530	56	241	140	111	416	156
rno-miR-145-3p	chr18:56969921-56969941-	2245	678	2096	1481	817	1406	1593	2225	1643
rno-miR-145-5p	chr18:56969957-56969979-	12929	7428	12483	11293	19092	22215	18712	24580	16251
rno-miR-146a-5p	chr10:28962533-28962554-	3	7	8	13	6	4	5	4	5
rno-miR-146b-3p	chr1:266089542-266089562+	0	0	4	3	3	6	0	1	2
rno-miR-146b-5p	chr1:266089502-266089525+	1926	2173	2695	1951	954	1523	1227	1376	1705
rno-miR-147	chr3:114775390-114775411+	46	36	52	28	25	33	16	21	54
rno-miR-148a-3p	chr4:81013285-81013305-	34834	26652	29662	25253	22859	27138	27588	37003	31464
rno-miR-148a-5p	chr4:81013321-81013343-	50	41	4979	1462	12	18	12	23	22
rno-miR-148b-3p	chr7:144912098-144912119+	1755	1157	1328	1278	1216	2347	1331	2362	1572
rno-miR-148b-5p	chr7:144912061-144912082+	1107	745	1270	19	615	95	697	146	79
rno-miR-149-3p	chr9:100016501-100016518+	9	8	1	0	0	0	0	0	0
rno-miR-149-5p	chr9:100016455-100016477+	10687	8813	12006	9511	8123	13119	15855	15959	10727
rno-miR-150-5p	chr1:101115989-101116010+	31	32	53	30	41	58	54	49	46
rno-miR-151-3p	chr7:114485573-114485593-	48728	36032	41606	38575	31812	56367	42505	56427	51067
rno-miR-151-5p	chr7:114485608-114485628-	11074	8067	11149	10110	6584	14161	12470	14557	14175
rno-miR-152-3p	chr10:84719371-84719391+	1776	988	1321	995	934	1654	981	1767	1049
rno-miR-152-5p	chr10:84719333-84719355+	4943	4154	5545	890	688	1151	1088	1183	1058
rno-miR-155-3p	chr11:24176645-24176665+	18	16	25	0	3	5	0	1	8
rno-miR-155-5p	chr11:24176606-24176628+	2652	1822	2617	3249	2917	4873	5053	5733	5054
rno-miR-15b-3p	chr2:165605980-165606001+	499	644	488	409	280	696	474	568	490
rno-miR-15b-5p	chr2:165605942-165605963+	4049	2898	3813	3043	2794	5332	3256	4178	3098
rno-miR-16-3p	chr2:165606130-165606150+	57	35	52	20	16	33	26	33	25
rno-miR-16-5p	chr2:165606088-165606109+	100784	75783	92138	86296	71297	136288	84110	110999	94638
rno-miR-17-1-3p	chr15:100179929-100179950+	270	204	254	143	127	287	194	243	196
rno-miR-17-5p	chr15:100179892-100179914+	3936	3071	2861	3220	939	1791	2072	2343	1349
rno-miR-181a-1-3p	chr13:54952796-54952817+	6246	6401	7032	1822	1407	2385	1983	2058	1781
rno-miR-181a-2-3p	chr3:23150435-23150453+	100	98	116	65	46	67	68	37	49
rno-miR-181a-5p	chr13:54952756-54952778+	184430	229644	236170	244260	172596	315656	422376	388906	357359
rno-miR-181b-1-3p	chr13:54952978-54952998+	54	58	38	2	2	6	5	1	5
rno-miR-181b-5p	chr13:54952938-54952960+	29909	36128	37632	35403	23431	41628	50586	44218	42317
rno-miR-181c-3p	chr19:25290233-25290254-	2340	2157	2510	1894	1283	2223	2023	2443	1955
rno-miR-181c-5p	chr19:25290272-25290293-	9958	9961	9068	9259	6971	13423	16011	16864	16093
rno-miR-181d-3p	chr19:25290062-25290081-	7	4	5	0	0	3	0	0	0
rno-miR-181d-5p	chr19:25290101-25290123-	5210	5059	2083	1943	3937	6819	2295	6514	2506
rno-miR-182	chr4:57459776-57459800-	1585	1134	230	1324	173	181	89	1055	1035
rno-miR-183-3p	chr4:57463592-57463612-	7	5	4	2	6	4	3	10	9
rno-miR-183-5p	chr4:57463631-57463652-	397	139	299	252	234	249	238	399	254
rno-miR-1839-3p	chr1:143360266-143360287+	64	61	71	48	55	84	69	54	63
rno-miR-1839-5p	chr1:143360227-143360248+	747	887	955	957	694	1179	1260	1094	1035
rno-miR-184	chr8:97175666-97175687-	12	12	9	12	8	11	74	72	71
rno-miR-1843a-3p	chr6:103567586-103567607-	7	10	11	12	3	14	9	8	9
rno-miR-1843a-5p	chr6:103567625-103567645-	196	224	225	197	146	274	253	268	248
rno-miR-1843b-3p	chr13:77065486-77065506+	1	1	1	1	1	4	1	0	3
rno-miR-1843b-5p	chr13:77065449-77065471+	59	72	72	55	40	61	60	61	54
rno-miR-185-3p	chr11:86812759-86812777+	52	41	50	19	7	34	40	20	32
rno-miR-185-5p	chr11:86812715-86812736+	308	224	330	226	207	344	299	321	252
rno-miR-187-3p	chr18:16390524-16390545-	88	74	107	73	78	134	90	101	122
rno-miR-187-5p	chr18:16390565-16390582-	1	2	2	0	0	0	0	2	2
rno-miR-188-3p	chrX:16110319-16110338+	20	10	22	5	9	21	17	27	14
rno-miR-188-5p	chrX:16110280-16110300+	4225	4538	4880	2016	1538	2865	1948	2187	1981
rno-miR-18a-3p	chr15:100180072-100180092+	160	127	160	66	83	110	135	150	116
rno-miR-18a-5p	chr15:100180031-100180053+	1431	883	1103	973	1060	1821	984	1903	1219
rno-miR-190a-3p	chr8:73030060-73030081-	8	5	5	9	3	12	5	8	9
rno-miR-190a-5p	chr8:73030096-73030117-	591	431	489	360	420	627	469	623	487
rno-miR-190b-5p	chr2:189421147-189421167+	66	43	76	70	43	76	55	81	56
rno-miR-191a-3p	chr8:117354420-117354441+	80	74	65	24	26	43	27	37	32
rno-miR-191a-5p	chr8:117354378-117354400+	233547	123292	197374	195442	193216	323000	272108	433863	317906
rno-miR-191b	chr8:117354419-117354439-	4	6	8	9	5	9	4	13	12
rno-miR-192-3p	chr1:221635037-221635058+	1	8	7	1	1	0	4	3	2
rno-miR-192-5p	chr1:221634994-221635014+	21690	18423	21965	17152	14699	27076	23926	29679	22677
rno-miR-193b-3p	chr14:30331063-30331081-	453	349	433	349	269	652	402	494	387
rno-miR-194-3p	chr1:221634836-221634856+	0	2	3	1	1	2	1	0	0
rno-miR-194-5p	chr1:221634800-221634821+	552	629	549	526	463	858	378	742	662
rno-miR-1949	chr18:28353214-28353236+	2	0	2	2	0	3	2	1	1
rno-miR-195-3p	chr10:56845353-56845375+	79	65	81	18	14	24	18	29	29
rno-miR-195-5p	chr10:56845315-56845335+	388	408	384	323	323	395	365	472	369
rno-miR-1956-3p	chr2:243819879-243819896+	1	1	3	1	0	1	0	0	0
rno-miR-1956-5p	chr2:243819840-243819861+	1	7	3	2	1	4	4	2	2
rno-miR-196a-5p	chr7:144584259-144584280+	48	31	49	38	45	63	49	26	23
rno-miR-196b-3p	chr4:82199068-82199090-	10	7	2	2	2	10	6	14	2
rno-miR-196b-5p	chr4:82199104-82199125-	3065	2565	3366	3012	2932	4309	3045	3866	2341
rno-miR-199a-3p	chr13:80125556-80125577+	51491	52998	54546	48167	37273	70363	61173	61094	61620
rno-miR-199a-5p	chr13:80125517-80125539+	26103	13002	22734	16803	16627	28051	19016	27016	20796
rno-miR-19a-3p	chr15:100180210-100180232+	803	464	892	873	1022	1136	1090	1439	1159
rno-miR-19a-5p	chr15:100180174-100180193+	71	53	60	45	50	63	38	62	55
rno-miR-19b-1-5p	chr15:100180479-100180500+	11	6	3	2	2	4	4	4	0
rno-miR-19b-3p	chr15:100180517-100180539+	2142	1235	2370	2190	2052	2176	2800	3587	2204
rno-miR-200a-3p	chr5:173489380-173489401-	0	2	3	1	3	1	2	0	0
rno-miR-200b-3p	chr5:173490160-173490182-	13	2	10	3	5	6	3	4	2
rno-miR-200c-3p	chr4:157236790-157236810-	10	1	10	4	8	5	3	9	0
rno-miR-201-3p	chrX:155339186-155339207+	0	0	2	0	0	1	2	1	2
rno-miR-201-5p	chrX:155339151-155339170+	0	2	2	2	1	6	1	1	5
rno-miR-202-5p	chr1:212295675-212295693-	0	0	0	2	2	1	0	4	4
rno-miR-203a-3p	chr6:136705012-136705033+	0	0	0	1	1	2	0	1	0
rno-miR-204-5p	chr1:240403032-240403053+	1	1	0	0	0	0	3	4	6
rno-miR-205	chr13:112233336-112233358-	14	6	16	11	6	10	8	8	7
rno-miR-206-3p	chr9:26791814-26791835+	611	529	666	205	127	254	158	138	129
rno-miR-206-5p	chr9:26791776-26791797+	36	29	1	0	0	0	1	0	0
rno-miR-208b-3p	chr15:33639543-33639560-	2	4	1	4	4	4	1	1	5
rno-miR-20a-3p	chr15:100180385-100180405+	14	10	19	3	10	9	11	3	2
rno-miR-20a-5p	chr15:100180349-100180371+	2431	1692	2515	1443	1799	2287	2350	2111	2325
rno-miR-210-3p	chr1:214208378-214208399-	174	191	219	122	95	159	159	168	147
rno-miR-210-5p	chr1:214208416-214208437-	9	6	6	1	1	2	1	1	4
rno-miR-211-5p	chr1:125042144-125042165+	7	8	12	6	10	15	17	33	13
rno-miR-212-3p	chr10:62014773-62014794+	42	27	31	54	32	61	94	71	55
rno-miR-212-5p	chr10:62014733-62014756+	21	16	17	18	10	16	16	27	26
rno-miR-214-3p	chr13:80130975-80130995+	17710	13856	17227	11063	9997	18168	14529	15871	14798
rno-miR-214-5p	chr13:80130918-80130934+	2010	1662	1980	1464	1222	2144	1683	1908	1900
rno-miR-217-5p	chr14:113119560-113119581+	2	3	3	1	2	2	8	6	4
rno-miR-218a-1-3p	chr14:66923109-66923129-	82	54	83	69	52	70	8	117	15
rno-miR-218a-5p	chr10:20428685-20428705+	3867	3397	4184	1467	1855	2207	2328	1745	2498
rno-miR-219a-1-3p	chr20:3816185-3816206-	168	153	161	95	80	120	111	131	155
rno-miR-219a-5p	chr20:3816227-3816247-	97	66	15	72	15	20	17	16	77
rno-miR-219b	chr3:8407445-8407466+	8	4	10	1	1	2	13	1	2
rno-miR-221-3p	chrX:3684544-3684566+	8469	7148	8992	8718	6978	13396	13428	16289	11394
rno-miR-221-5p	chrX:3684504-3684526+	472	126	111	83	52	187	82	139	127
rno-miR-222-3p	chrX:3683980-3684000+	5647	4881	5876	7077	5211	9487	13989	15010	12023
rno-miR-222-5p	chrX:3683940-3683960+	243	257	313	21	18	26	28	23	23
rno-miR-22-3p	chr10:62299648-62299669+	872893	768874	905997	822022	600107	1118499	946052	1045685	998101
rno-miR-22-5p	chr10:62299610-62299631+	591	410	682	505	513	797	667	749	568
rno-miR-23a-3p	chr19:25318627-25318647+	16268	11316	16720	15236	15283	22973	20989	27346	17723
rno-miR-23a-5p	chr19:25318591-25318612+	20	26	22	0	0	6	3	2	2
rno-miR-23b-3p	chr17:823279-823299+	2530	2043	2543	2193	2104	3070	2904	3537	2196
rno-miR-24-1-5p	chr17:823973-823994+	57	19	32	7	3	21	3	5	6
rno-miR-24-2-5p	chr19:25318887-25318908+	9284	5894	8691	6033	7690	12575	8358	11171	7973
rno-miR-24-3p	chr17:824011-824032+	5339	3598	4425	4078	3038	4991	3418	3990	3453
rno-miR-25-3p	chr12:19307351-19307372-	59297	53816	54721	49679	38780	76829	54034	65042	54601
rno-miR-25-5p	chr12:19307389-19307410-	196	143	220	213	186	254	212	263	211
rno-miR-26a-3p	chr8:127714495-127714515+	12	2	5	0	3	1	1	0	1
rno-miR-26a-5p	chr8:127714456-127714477+	112484	65439	107197	90374	80923	136056	110280	133670	133137
rno-miR-26b-3p	chr9:81675325-81675346+	330	307	78	33	42	175	182	69	108
rno-miR-26b-5p	chr9:81675289-81675309+	29976	25152	28754	24791	19437	40028	27726	35784	28518
rno-miR-27a-3p	chr19:25318791-25318811+	24608	19801	24972	23720	18787	38503	32874	42774	33357
rno-miR-27a-5p	chr19:25318749-25318770+	1097	994	1150	7	16	15	11	17	11
rno-miR-27b-3p	chr17:823521-823541+	98503	66664	96942	83789	66363	126056	107438	128890	105227
rno-miR-27b-5p	chr17:823479-823502+	424	401	388	153	142	208	189	222	198
rno-miR-296-3p	chr3:172357500-172357521-	322	307	371	256	196	335	313	326	293
rno-miR-296-5p	chr3:172357535-172357555-	427	344	419	372	14	741	491	556	463
rno-miR-298-3p	chr3:172357952-172357973-	124	100	91	153	135	208	181	210	64
rno-miR-298-5p	chr3:172357992-172358014-	17721	12157	18964	13879	12570	13769	14252	15676	17312
rno-miR-29a-3p	chr4:58343944-58343965-	14461	10981	15172	15941	10072	18624	18917	24695	20283
rno-miR-29a-5p	chr4:58343982-58344003-	331	303	394	173	292	293	327	5	328
rno-miR-29b-1-5p	chr4:58344355-58344376-	160	129	172	25	30	44	38	55	35
rno-miR-29b-3p	chr1:38238427-38238449+	704	576	698	275	302	524	232	554	564
rno-miR-29b-5p	chr1:38238386-38238407+	9	4	3	3	2	2	2	2	1
rno-miR-29c-3p	chr1:38238957-38238978+	315	276	338	247	253	528	326	379	308
rno-miR-29c-5p	chr1:38238919-38238940+	37	25	34	6	5	11	9	11	5
rno-miR-301b-3p	chr11:88129470-88129492+	8	4	4	6	2	14	8	16	8
rno-miR-3064-5p	chr10:94982094-94982113-	2	0	4	1	1	1	0	1	3
rno-miR-3065-5p	chr10:109195254-109195273+	4	0	1	3	0	2	1	5	1
rno-miR-3068-3p	chr6:111468737-111468758-	566	480	738	538	400	670	574	539	589
rno-miR-3068-5p	chr6:111468775-111468799-	11	4	10	6	6	2	52	103	7
rno-miR-3074	chr17:823971-823992-	52	30	44	46	39	78	61	96	75
rno-miR-3075	chr16:1822830-1822853+	18	15	13	19	12	17	19	35	22
rno-miR-3099	chr1:70136980-70137001-	35	22	31	28	34	41	34	46	34
rno-miR-30a-3p	chr9:29542681-29542702+	1260	1297	1242	1169	927	1775	1330	1387	1300
rno-miR-30a-5p	chr9:29542640-29542661+	158888	161989	187245	150033	130712	208668	164170	170129	167253
rno-miR-30c-1-3p	chr5:139699889-139699910-	207	148	5	3	42	1	31	51	47
rno-miR-30c-2-3p	chr9:29562429-29562450+	401	443	467	165	127	222	196	200	203
rno-miR-30c-5p	chr5:139699927-139699949-	24294	22403	13480	13150	12876	22453	14482	16234	13644
rno-miR-30d-3p	chr7:109286472-109286493-	779	564	132	154	128	219	164	100	112
rno-miR-30d-5p	chr7:109286512-109286533-	61770	57502	76066	58390	45286	69592	57445	52556	59519
rno-miR-30e-3p	chr5:139702884-139702905-	1752	1988	1787	96	71	1434	1047	99	100
rno-miR-30e-5p	chr5:139702926-139702947-	50018	36867	5139	39847	3581	54609	36219	5242	46277
rno-miR-3102	chr1:165921224-165921244-	257	185	276	113	95	9	134	9	21
rno-miR-31a-3p	chr5:107206578-107206600+	636	425	598	427	511	957	774	1083	481
rno-miR-31a-5p	chr5:107206542-107206563+	14342	15077	16402	13462	10471	17290	20837	18671	17747
rno-miR-320-3p	chr15:52134323-52134344+	2233	2262	2627	2431	1982	3305	3177	3093	2840
rno-miR-322-3p	chrX:158148221-158148240+	3416	2033	3402	2164	1357	2339	2127	2164	1980
rno-miR-322-5p	chrX:158148183-158148204+	17227	12620	16420	11684	10963	18747	11326	13813	11985
rno-miR-32-3p	chr5:73934258-73934279-	8	9	6	1	3	6	2	3	0
rno-miR-324-3p	chr10:56621176-56621197+	206	222	232	137	101	191	172	193	128
rno-miR-324-5p	chr10:56621141-56621163+	423	380	458	274	286	414	282	354	235
rno-miR-325-3p	chrX:76334294-76334315-	31	20	42	13	16	20	25	22	26
rno-miR-325-5p	chrX:76334331-76334353-	2	1	3	4	2	6	0	0	1
rno-miR-32-5p	chr5:73934298-73934319-	6	1	3	5	3	3	5	1	3
rno-miR-328a-3p	chr19:37263214-37263235-	1059	933	1091	911	720	1299	1130	1723	1367
rno-miR-330-3p	chr1:80092740-80092762+	59	40	78	46	55	74	76	85	40
rno-miR-330-5p	chr1:80092701-80092722+	727	480	698	565	509	883	676	965	769
rno-miR-331-3p	chr7:34881110-34881130-	1332	824	968	866	708	1261	715	1000	133
rno-miR-331-5p	chr7:34881166-34881184-	19	13	20	1	1	3	5	1	5
rno-miR-33-3p	chr7:123431657-123431677+	60	35	51	44	35	66	46	52	55
rno-miR-33-5p	chr7:123431617-123431637+	225	173	303	98	96	214	112	168	101
rno-miR-336-5p	chr10:35349771-35349791+	1	0	0	1	1	1	0	0	0
rno-miR-338-3p	chr10:109195254-109195276-	4	1	5	4	1	9	3	2	1
rno-miR-339-3p	chr12:17369052-17369074+	234	213	236	214	155	318	285	258	247
rno-miR-339-5p	chr12:17369017-17369039+	437	466	462	350	256	590	497	572	531
rno-miR-342-3p	chr6:132561229-132561251+	2155	1363	2246	1851	2224	3503	3549	4228	2688
rno-miR-342-5p	chr6:132561187-132561208+	101	81	96	60	55	91	78	57	56
rno-miR-344a-3p	chr1:122309575-122309597-	0	3	4	1	1	1	0	3	2
rno-miR-344b-1-3p	chr1:121193161-121193182-	3	1	3	2	1	0	2	0	2
rno-miR-345-3p	chr6:132749021-132749042+	313	273	306	199	201	366	232	325	231
rno-miR-345-5p	chr6:132748983-132749003+	495	398	519	416	365	584	359	458	323
rno-miR-3473	chr13:44719374-44719395+	10	10	10	7	7	7	16	16	9
rno-miR-34a-3p	chr5:167092554-167092575+	60	45	51	14	8	25	11	8	9
rno-miR-34a-5p	chr5:167092510-167092531+	2392	1864	2537	1557	1225	2350	1677	1969	1774
rno-miR-34b-3p	chr8:55492554-55492575-	2177	2020	2397	1856	1665	2707	2443	2306	1867
rno-miR-34b-5p	chr8:55492590-55492612-	4038	3738	4390	2455	2454	3893	2818	3286	2527
rno-miR-34c-3p	chr8:55492034-55492055-	871	746	120	620	477	960	683	757	91
rno-miR-34c-5p	chr8:55492066-55492088-	105389	87655	120004	82141	69509	109620	87967	99021	89672
rno-miR-350	chr13:43827552-43827575+	415	276	332	296	477	371	351	567	200
rno-miR-351-3p	chrX:158149261-158149281+	232	126	182	80	95	139	110	145	79
rno-miR-351-5p	chrX:158149221-158149245+	195368	131902	198002	246829	214150	361795	387500	478902	421813
rno-miR-3542	chr17:9370948-9370968+	6	4	6	4	2	6	2	5	1
rno-miR-3549	chr10:67065916-67065934-	20	3	23	3	4	7	6	9	5
rno-miR-3558-5p	chr6:10992716-10992739+	16	8	12	9	5	15	9	9	12
rno-miR-3559-3p	chrX:75459266-75459287-	340	419	425	261	204	390	336	351	298
rno-miR-3559-5p	chrX:75459306-75459327-	947	934	1024	770	746	1480	1058	1101	903
rno-miR-3572	chr1:64135984-64136007-	4	1	0	1	1	2	0	2	1
rno-miR-3580-3p	chrX:151295627-151295648-	12	13	10	13	6	17	18	24	22
rno-miR-3580-5p	chrX:151295661-151295682-	11	12	13	6	12	17	10	12	10
rno-miR-3585-3p	chrX:155344242-155344260+	2	7	5	3	1	3	1	3	3
rno-miR-3585-5p	chrX:155344207-155344228+	59	38	48	1	48	1	1	1	1
rno-miR-3594-3p	chr10:109244639-109244660-	6	2	5	2	1	1	2	4	1
rno-miR-361-3p	chrX:84708914-84708937-	280	237	283	260	161	320	208	206	211
rno-miR-361-5p	chrX:84708954-84708975-	956	485	859	649	670	932	715	1043	800
rno-miR-362-3p	chrX:16117211-16117232+	201	111	145	112	116	206	174	212	134
rno-miR-362-5p	chrX:16117174-16117197+	222	62	229	138	104	115	114	191	143
rno-miR-374-3p	chrX:74443655-74443676-	903	439	729	285	287	462	266	395	52
rno-miR-374-5p	chrX:74443685-74443706-	496	455	569	426	445	672	117	561	356
rno-miR-375-3p	chr9:82161725-82161746-	0	1	0	4	0	0	18	4	6
rno-miR-378a-3p	chr18:56726153-56726173-	39767	41378	45911	26591	21376	36628	29329	28976	27165
rno-miR-378a-5p	chr18:56726190-56726211-	210	156	217	72	72	171	124	151	127
rno-miR-384-3p	chrX:76301773-76301794-	161	89	106	100	85	170	82	115	75
rno-miR-384-5p	chrX:76301813-76301835-	36	37	59	39	17	39	21	1	1
rno-miR-411-5p	chr6:133858859-133858879+	0	0	1	2	2	1	1	2	3
rno-miR-421-3p	chrX:74443505-74443524-	6947	5021	6581	5804	4784	7736	6499	6955	7755
rno-miR-421-5p	chrX:74443541-74443561-	259	315	315	97	77	118	62	83	56
rno-miR-423-3p	chr10:63098412-63098434+	2686	3552	3882	2008	1378	2106	2193	1734	1841
rno-miR-423-5p	chr10:63098376-63098399+	3305	2941	3777	3783	2398	4101	4633	3960	3923
rno-miR-425-3p	chr8:117354872-117354892+	155	124	117	111	111	189	164	145	139
rno-miR-425-5p	chr8:117354831-117354853+	2509	1807	2340	2085	1825	3268	2441	2934	2550
rno-miR-434-3p	chr6:133715427-133715448+	0	0	0	1	1	1	0	0	0
rno-miR-449a-3p	chr2:44897656-44897677+	3	1	2	0	0	0	0	0	0
rno-miR-449a-5p	chr2:44897616-44897637+	244	324	362	235	108	224	148	152	218
rno-miR-449c-5p	chr2:44896085-44896105+	334	230	317	230	162	264	329	310	280
rno-miR-450a-3p	chrX:158153428-158153448+	42	24	47	34	20	6	5	23	12
rno-miR-450a-5p	chrX:158153394-158153415+	29299	17405	25946	21981	16039	32820	18744	23254	23346
rno-miR-450b-3p	chrX:158153296-158153316+	170	144	162	135	98	245	133	144	114
rno-miR-450b-5p	chrX:158153261-158153281+	6361	4385	6611	5483	4080	7728	4633	5434	4570
rno-miR-455-3p	chr5:79097255-79097276+	455	237	355	297	438	442	710	631	704
rno-miR-455-5p	chr5:79097218-79097239+	975	1039	1095	683	631	1028	911	1015	939
rno-miR-463-3p	chrX:151276039-151276060-	6	3	3	4	1	7	3	2	6
rno-miR-463-5p	chrX:151276077-151276097-	56	42	64	52	30	68	72	54	55
rno-miR-466b-5p	chr17:71809097-71809118-	259	188	272	118	97	157	145	137	92
rno-miR-466c-5p	chr17:72060125-72060145-	154	106	173	79	61	104	95	91	68
rno-miR-471-3p	chrX:151272117-151272136-	4	3	5	2	4	6	4	2	4
rno-miR-471-5p	chrX:151272150-151272171-	22	15	10	11	26	24	11	39	10
rno-miR-483-3p	chr1:215832094-215832115-	125	131	126	82	56	88	73	94	70
rno-miR-483-5p	chr1:215832132-215832153-	45	57	66	31	29	58	54	50	35
rno-miR-484	chr10:27855-27876-	95	96	129	105	69	147	102	118	108
rno-miR-490-3p	chr4:63343001-63343022+	0	0	0	1	2	1	1	2	2
rno-miR-497-5p	chr10:56844978-56844999+	820	752	759	688	667	1218	856	974	750
rno-miR-499-3p	chr3:151138903-151138924+	3	3	2	1	1	1	1	2	3
rno-miR-499-5p	chr3:151138866-151138886+	40	40	39	31	34	57	61	49	46
rno-miR-500-3p	chrX:16121380-16121401+	331	239	298	226	164	416	322	414	267
rno-miR-500-5p	chrX:16121342-16121365+	19	14	10	10	9	11	3	3	13
rno-miR-501-3p	chrX:16117924-16117946+	903	69	718	505	190	217	462	688	479
rno-miR-501-5p	chrX:16117887-16117906+	22	16	18	21	30	45	27	40	20
rno-miR-503-3p	chrX:158148521-158148543+	654	408	525	229	136	297	119	264	63
rno-miR-503-5p	chrX:158148481-158148503+	277	208	257	120	82	196	116	157	91
rno-miR-505-3p	chrX:143517019-143517038-	1692	1364	1661	1607	1894	2729	2204	1919	1854
rno-miR-505-5p	chrX:143517053-143517075-	59	41	53	59	69	38	45	64	49
rno-miR-5132-5p	chrX:156716805-156716826+	1	2	2	0	0	0	0	1	3
rno-miR-532-3p	chrX:16109917-16109938+	787	597	818	716	669	1211	979	1135	810
rno-miR-532-5p	chrX:16109880-16109901+	9069	8397	9842	6764	5012	10036	7866	9276	7477
rno-miR-542-3p	chrX:158152194-158152215+	8744	10526	11269	6726	3928	6970	4002	4027	4676
rno-miR-542-5p	chrX:158152156-158152177+	1029	894	1081	956	700	1399	1065	1144	955
rno-miR-582-3p	chr2:40863797-40863818+	1171	1212	1187	1301	951	1825	1649	1420	1471
rno-miR-582-5p	chr2:40863760-40863781+	130	88	112	58	127	102	177	194	79
rno-miR-592	chr4:55182426-55182448-	1517	1381	1649	1642	1232	2535	1920	2157	1730
rno-miR-598-3p	chr15:46893204-46893225+	504	462	585	388	335	638	342	451	322
rno-miR-598-5p	chr15:46893167-46893188+	3	8	3	2	0	0	0	0	0
rno-miR-6315	chr1:221434051-221434073-	35	38	41	24	28	33	4	39	35
rno-miR-6317	chr1:259080746-259080766-	13	10	24	6	12	19	6	20	14
rno-miR-6318	chr19:37262650-37262671-	82	74	79	1	60	2	1	71	1
rno-miR-6319	chr17:34746623-34746643+	8	16	10	4	2	12	14	1	1
rno-miR-6321	chr14:21097416-21097438-	108	79	123	81	82	125	84	126	79
rno-miR-6324	chr11:36383559-36383581-	73	52	65	39	29	37	46	40	57
rno-miR-6328	chr20:3394869-3394889+	210	134	206	193	111	174	47	302	51
rno-miR-6329	chr8:56629648-56629670-	164	105	160	143	118	164	138	150	147
rno-miR-652-3p	chrX:114002584-114002604+	325	234	315	231	168	357	305	321	239
rno-miR-652-5p	chrX:114002543-114002565+	6	5	3	8	6	11	4	0	8
rno-miR-664-2-5p	chr13:103192581-103192601+	60	57	67	33	18	54	36	42	43
rno-miR-664-3p	chr13:103192618-103192639+	152	105	171	167	163	375	217	304	259
rno-miR-671	chr4:7108758-7108778-	620	596	686	156	93	188	178	183	148
rno-miR-672-5p	chrX:74982117-74982139-	8	3	7	5	6	10	6	5	7
rno-miR-674-3p	chr3:108864507-108864528+	355	276	409	389	291	458	475	502	446
rno-miR-674-5p	chr3:108864472-108864493+	167	137	169	151	80	165	160	167	134
rno-miR-675-3p	chr1:215745995-215746015-	450	526	534	450	385	767	498	523	400
rno-miR-675-5p	chr1:215746029-215746050-	30	20	20	24	16	23	16	21	9
rno-miR-676	chrX:70207069-70207090+	6025	4917	6043	5056	3552	6763	5704	7137	6865
rno-miR-702-3p	chr12:22721850-22721872-	341	246	364	335	290	442	357	398	335
rno-miR-702-5p	chr12:22721932-22721952-	221	169	214	11	8	17	6	7	6
rno-miR-708-3p	chr1:161221302-161221323+	3	3	3	0	2	0	1	0	0
rno-miR-741-3p	chrX:151274373-151274394-	20	20	19	27	10	26	27	32	35
rno-miR-742-3p	chrX:151260323-151260344-	2	2	1	0	0	0	0	1	0
rno-miR-743a-3p	chrX:151252838-151252859-	34	18	37	32	25	40	31	36	26
rno-miR-743a-5p	chrX:151252872-151252893-	3	4	2	2	0	3	2	5	2
rno-miR-743b-3p	chrX:151253328-151253349-	144	106	165	151	112	221	204	189	192
rno-miR-743b-5p	chrX:151253363-151253384-	14	20	12	11	12	12	13	14	14
rno-miR-760-3p	chr2:225873366-225873385-	156	160	119	131	121	165	133	114	115
rno-miR-760-5p	chr2:225873401-225873422-	9	10	10	1	3	2	0	0	1
rno-miR-7a-1-3p	chr17:6675075-6675096+	141	82	142	73	49	45	25	54	31
rno-miR-7a-5p	chr1:140576414-140576436+	1410	943	969	436	561	930	463	909	609
rno-miR-802-3p	chr11:33570310-33570332+	1	1	2	1	0	0	0	1	0
rno-miR-802-5p	chr11:33570272-33570292+	0	4	0	2	2	4	2	5	0
rno-miR-871-3p	chrX:151287798-151287819-	199	7	223	126	32	24	112	114	83
rno-miR-872-3p	chr5:113657776-113657797+	6900	5917	7383	6837	6134	11399	11502	12352	9165
rno-miR-872-5p	chr5:113657737-113657757+	5590	5010	5533	4819	4564	8701	5937	6879	5724
rno-miR-874-3p	chr17:7025058-7025079+	245	142	208	153	170	338	252	333	262
rno-miR-874-5p	chr17:7025023-7025043+	29	24	22	15	16	33	17	19	8
rno-miR-877	chr20:3318872-3318891+	219	201	244	267	206	284	471	435	395
rno-miR-878	chrX:151283471-151283492-	3	4	4	1	5	5	7	1	4
rno-miR-879-5p	chr4:21673680-21673700-	3	3	3	3	3	1	1	1	3
rno-miR-880-3p	chrX:151281998-151282019-	23	30	15	19	14	32	33	29	19
rno-miR-881-3p	chrX:151283921-151283942-	309	280	305	233	226	369	291	364	60
rno-miR-881-5p	chrX:151283958-151283976-	1	0	1	3	2	0	3	1	1
rno-miR-883-3p	chrX:151260713-151260734-	6	6	0	3	1	1	1	9	1
rno-miR-92a-1-5p	chr15:100180596-100180618+	1870	1300	1875	57	56	60	42	47	35
rno-miR-92a-3p	chr15:100180633-100180653+	203537	172781	214466	198393	143064	263204	205457	206861	181273
rno-miR-92b-3p	chr2:188541044-188541065-	748	446	709	751	703	923	1029	1732	1370
rno-miR-93-3p	chr12:19307555-19307577-	166	116	163	107	91	150	102	127	108
rno-miR-93-5p	chr12:19307593-19307615-	17196	16639	19385	12600	14119	27884	16564	17456	12357
rno-miR-96-5p	chr4:57463426-57463448-	12	3	19	9	8	16	6	10	16
rno-miR-99a-3p	chr11:16052202-16052223+	397	362	386	151	143	251	157	213	198
rno-miR-99a-5p	chr11:16052165-16052186+	9567	3314	7924	6074	4741	8616	6069	10106	6187
rno-miR-99b-3p	chr1:59704260-59704281+	685	809	731	507	317	696	651	650	560
rno-miR-99b-5p	chr1:59704222-59704243+	142129	13474	143511	87098	28180	34267	82064	120775	77046
rno-miR-9a-5p	chr1:141229368-141229390+	36	37	33	20	23	34	29	42	24
0A/B/C, 12A/B/C and 24A/B/C represent samples collected at 0, 12 and 24 h of Dox treatment, respectively. Counts present original miRNAs reads. miR/miRNA, microRNA.
